# Supplementary material for: Assessing the Spatiotemporal Relationship between Coastal Habitats and Fish Assemblages at Two Neotropical Estuaries of the Mexican Pacific
Source: MDPI journal article supplement (doi:10.3390/d14080619), 2022-08-02
Supplement: s1 [file s1]

### Supplementary material

Table S1. PERMANOVA results of the pairwise comparisons between the factor “season” for the matrix of environmental variables using Euclidean distances for the resemblance matrix.

| Seasons  | t    | P(perm) | Unique perms |
|----------|------|---------|--------------|
| DCS, DWS | 1.94 | 0.00    | 999          |
| DCS, HWS | 3.02 | 0.00    | 997          |
| DWS, HWS | 1.44 | 0.09    | 999          |

Table S2. PERMANOVA results of the pairwise comparisons between the factor “habitat” for the matrix of environmental variables using Euclidean distances for the resemblance matrix.

| Habitats                                  | t    | P(perm) | Unique perms |
|-------------------------------------------|------|---------|--------------|
| Caimanero lagoon, Huizache lagoon         | 0.85 | 0.53    | 126          |
| Caimanero lagoon, river                   | 2.60 | 0.03    | 35           |
| Caimanero lagoon, tidal mangrove creek    | 1.89 | 0.02    | 537          |
| Caimanero lagoon, ocean                   | 3.12 | 0.00    | 933          |
| Caimanero lagoon, inner tidal channel     | 3.09 | 0.00    | 315          |
| Caimanero lagoon, Agua Grande Lagoon      | 2.35 | 0.05    | 35           |
| Caimanero lagoon, main tidal channel      | 2.36 | 0.01    | 209          |
| Huizache lagoon, river                    | 2.80 | 0.00    | 126          |
| Huizache lagoon, tidal mangrove creek     | 2.02 | 0.02    | 787          |
| Huizache lagoon, ocean                    | 4.40 | 0.00    | 989          |
| Huizache lagoon, inner tidal channel      | 3.52 | 0.00    | 565          |
| Huizache lagoon, Agua Grande Lagoon       | 3.05 | 0.02    | 56           |
| Huizache lagoon, main tidal channel       | 2.80 | 0.00    | 421          |
| river, tidal mangrove creek               | 1.73 | 0.06    | 535          |
| river, ocean                              | 5.44 | 0.00    | 956          |
| river, inner tidal channel                | 1.59 | 0.05    | 316          |
| river, Agua Grande Lagoon                 | 1.66 | 0.17    | 35           |
| river, main tidal channel                 | 1.82 | 0.06    | 210          |
| tidal mangrove creek, ocean               | 4.95 | 0.00    | 999          |
| tidal mangrove creek, inner tidal channel | 1.31 | 0.04    | 959          |
| tidal mangrove creek, Agua Grande Lagoon  | 1.68 | 0.06    | 219          |
| tidal mangrove creek, main tidal channel  | 2.71 | 0.00    | 891          |
| ocean, inner tidal channel                | 6.60 | 0.00    | 997          |
| ocean, Agua Grande Lagoon                 | 3.02 | 0.00    | 753          |
| ocean, main tidal channel                 | 4.35 | 0.00    | 996          |
| inner tidal channel, Agua Grande Lagoon   | 2.02 | 0.02    | 120          |
| inner tidal channel, main tidal channel   | 2.57 | 0.00    | 761          |
| Agua Grande Lagoon, main tidal channel    | 2.41 | 0.00    | 84           |

Table S3. PERMANOVA results of the pairwise comparisons between the factor “zones” for the matrix of environmental variables using Euclidean distances for the resemblance matrix.

| Zones                                  | t    | P(perm) | Unique perms |
|----------------------------------------|------|---------|--------------|
| unvegetated zones, buttonwood mangrove | 0.75 | 0.52    | 56           |
| unvegetated zones, white mangrove      | 2.22 | 0.00    | 524          |
| unvegetated zones, ocean               | 4.28 | 0.00    | 769          |
| unvegetated zones, red mangrove        | 2.43 | 0.00    | 559          |
| buttonwood mangrove, white mangrove    | 2.35 | 0.00    | 964          |
| buttonwood mangrove, ocean             | 4.50 | 0.00    | 987          |
| buttonwood mangrove, red mangrove      | 2.84 | 0.00    | 962          |
| white mangrove, ocean                  | 5.40 | 0.00    | 999          |
| white mangrove, red mangrove           | 2.60 | 0.00    | 998          |
| ocean, red mangrove                    | 5.13 | 0.00    | 999          |

Table S4. PERMANOVA results of the pairwise comparisons between the factor “habitat” for the matrix of fish assemblages using Bray-Curtis similarity for the resemblance matrix.

| Groups                                    | t    | P(perm) | Unique perms |
|-------------------------------------------|------|---------|--------------|
| AguaGrande Lagoon, Main Tidal Channel     | 1.43 | 0.03    | 84           |
| Caimanero lagoon, AguaGrande Lagoon       | 1.43 | 0.02    | 35           |
| Caimanero lagoon, Coast                   | 1.69 | 0.00    | 943          |
| Caimanero lagoon, Huizache lagoon         | 1.17 | 0.09    | 126          |
| Caimanero lagoon, Inner Tidal Channel     | 1.22 | 0.06    | 315          |
| Caimanero lagoon, Main Tidal Channel      | 1.34 | 0.05    | 208          |
| Caimanero lagoon, River                   | 1.19 | 0.06    | 35           |
| Caimanero lagoon, tidal mangrove creek    | 1.16 | 0.15    | 526          |
| Coast, AguaGrande Lagoon                  | 1.47 | 0.00    | 725          |
| Coast, Inner Tidal Channel                | 1.65 | 0.00    | 996          |
| Coast, Main Tidal Channel                 | 1.74 | 0.00    | 995          |
| Huizache lagoon, AguaGrande Lagoon        | 1.41 | 0.02    | 56           |
| Huizache lagoon, Coast                    | 1.75 | 0.00    | 978          |
| Huizache lagoon, Inner Tidal Channel      | 1.50 | 0.00    | 559          |
| Huizache lagoon, Main Tidal Channel       | 1.38 | 0.02    | 426          |
| Huizache lagoon, River                    | 1.08 | 0.22    | 126          |
| Huizache lagoon, tidal mangrove creek     | 0.92 | 0.66    | 782          |
| Inner Tidal Channel, AguaGrande Lagoon    | 1.03 | 0.42    | 120          |
| Inner Tidal Channel, Main Tidal Channel   | 1.26 | 0.03    | 737          |
| River, AguaGrande Lagoon                  | 1.26 | 0.03    | 35           |
| River, Coast                              | 1.46 | 0.00    | 937          |
| River, Inner Tidal Channel                | 1.26 | 0.04    | 315          |
| River, Main Tidal Channel                 | 1.22 | 0.05    | 209          |
| River, tidal mangrove creek               | 1.27 | 0.04    | 550          |
| tidal mangrove creek, AguaGrande Lagoon   | 1.51 | 0.01    | 217          |
| tidal mangrove creek, Coast               | 2.08 | 0.00    | 999          |
| tidal mangrove creek, Inner Tidal Channel | 1.58 | 0.00    | 955          |
| tidal mangrove creek, Main Tidal Channel  | 1.66 | 0.00    | 892          |

Table S5. PERMANOVA results of the pairwise comparisons between the factor “zones” for the matrix of fish assemblages using Bray-Curtis similarity for the resemblance matrix.

| <b>Groups</b>                          | <b>t</b> | <b>P(perm)</b> | <b>Unique perms</b> |
|----------------------------------------|----------|----------------|---------------------|
| unvegetated zones, buttonwood mangrove | 0.89     | 0.90           | 560                 |
| unvegetated zones, white mangrove      | 1.41     | 0.02           | 520                 |
| unvegetated zones, ocean               | 1.45     | 0.01           | 753                 |
| unvegetated zones, red mangrove        | 1.42     | 0.01           | 579                 |
| buttonwood mangrove, white mangrove    | 1.91     | 0.00           | 944                 |
| buttonwood mangrove, ocean             | 1.67     | 0.00           | 988                 |
| buttonwood mangrove, red mangrove      | 1.50     | 0.00           | 956                 |
| white mangrove, ocean                  | 2.04     | 0.00           | 999                 |
| white mangrove, red mangrove           | 1.75     | 0.00           | 997                 |
| ocean, red mangrove                    | 2.09     | 0.00           | 997                 |
